# Supplementary material
Source: Springer Nature journal article supplement (https://www.springermedizin.de/resource/supplementary/12958_2009_548_MOESM2_ESM.pdf/9568278)

**A.**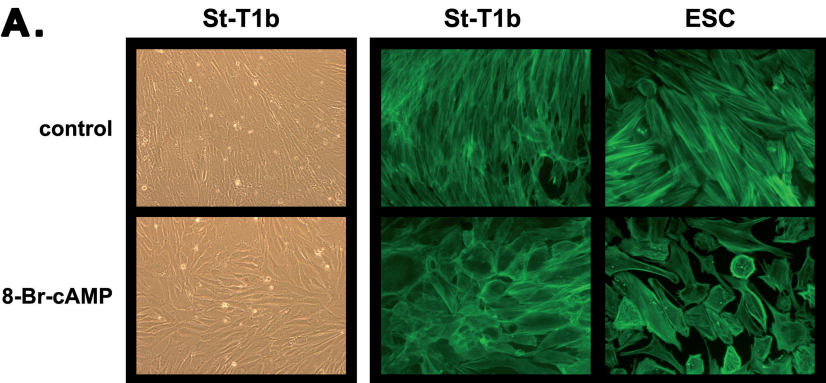**B.**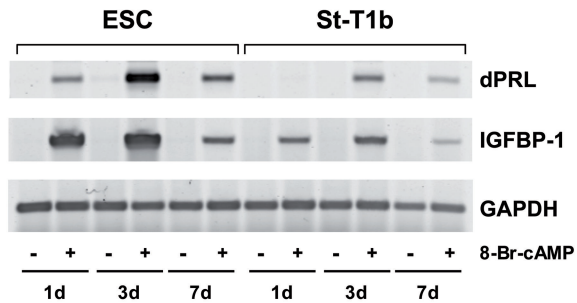

Supplement: MOESM2 [file 9568278]
